1 **Diverse Mechanisms of Resistance in Carbapenem-Resistant Enterobacteriaceae at a**  
2 **Health Care System in Silicon Valley, California**

3

4 Fiona Senchyna<sup>a</sup>, Rajiv L. Gaur<sup>a\*</sup>, Johanna Sandlund<sup>a\*</sup>, Cynthia Truong<sup>a\*</sup>, Guillaume  
5 Tremintin<sup>b</sup>, Dietmar Küeltz<sup>c</sup>, Carlos A. Gomez<sup>a,d</sup>, Fiona B. Tamburini<sup>e</sup>, Tessa Andermann<sup>d,e</sup>,  
6 Ami Bhatt<sup>e</sup>, Isabella Tickler<sup>f</sup>, Nancy Watz<sup>g</sup>, Indre Budvytiene<sup>g</sup>, Gongyi Shi<sup>b</sup>, Fred C. Tenover<sup>f</sup>,  
7 and Niaz Banaei<sup>a,d,g#</sup>

8

9 <sup>a</sup>Department of Pathology, Stanford University School of Medicine, Stanford, CA, USA

10 <sup>b</sup>Bruker Daltonics, Inc., San Jose, CA, USA

11 <sup>c</sup>Department of Animal Sciences, University of California, Davis, Davis, CA, USA

12 <sup>d</sup>Division of Infectious Diseases and Geographic Medicine, Department of Medicine, Stanford  
13 University School of Medicine, Stanford, CA, USA

14 <sup>e</sup>Division of Hematology, Department of Genetics, Stanford University School of Medicine,  
15 Stanford, CA, USA

16 <sup>f</sup>Cepheid, Sunnyvale, CA, USA

17 <sup>g</sup>Clinical Microbiology Laboratory, Stanford University Medical Center, Palo Alto, CA, USA

18

19 #Address correspondence to Niaz Banaei, [nbanaei@stanford.edu](mailto:nbanaei@stanford.edu)

20 \*Present Address: Rajiv L. Gaur, Cepheid, Inc., Sunnyvale, CA, USA; Johanna Sandlund,  
21 Singulex, Inc., Alameda, CA, USA; Cynthia Truong, Baylor College of Medicine, Houston, TX,  
22 USA.

23 **Keywords:** carbapenem-resistant enterobacteriaceae, carbapenemase, porin, avibactam,  
24 relebactam, vaborbactam

25 **Running title:** Resistance mechanism in CRE isolates

26

27

28

29

30

## 31 **Abstract**

32 Carbapenem-resistant Enterobacteriaceae (CRE) are emerging as a major health threat in North  
33 America. The mechanism of resistance to carbapenems has therapeutic and public health  
34 implications. We comprehensively characterized the underlying mechanisms of carbapenem  
35 resistance in CRE isolates recovered between 2013 and 2016 at a health system in Northern  
36 California. Genotypic methods were used to detect carbapenemases and plasmid-encoded  
37 cephalosporinases, and mass spectrometry was used to quantify relative porin levels for OmpC  
38 and OmpF and their analogs. MICs for imipenem-relebactam, meropenem-vaborbactam,  
39 ceftazidime-avibactam, and ceftolozane-tazobactam were measured. Whole genome sequencing  
40 was used for strain typing. A carbapenemase gene encoding *bla*<sub>OXA-48 like</sub>, *bla*<sub>NDM</sub>, *bla*<sub>KPC</sub>, *bla*<sub>SME</sub>,  
41 *bla*<sub>IMP</sub>, and *bla*<sub>VIM</sub> was detected in 38.7% (24/62) of CRE isolates. Porin levels was down at least  
42 2-fold in 91.9% (57/62) of isolates. Including carbapenemase genes and porin loss, the  
43 mechanism of resistance was identified in 95.2% (59/62) of CRE isolates. Of the carbapenemase  
44 gene-positive isolates, *bla*<sub>KPC</sub>-positive isolates were 100% susceptible to ceftazidime-avibactam,  
45 meropenem-vaborbactam, and imipenem-relebactam; *bla*<sub>OXA-48 like</sub>-positive isolates were 100%  
46 susceptible to ceftazidime-avibactam; and *bla*<sub>SME</sub>-positive isolates were 100% susceptible to  
47 meropenem-vaborbactam and ceftolozane-tazobactam. 100% (38/38), 92.1% (35/38), 89.5%  
48 (34/38), and 31.6% (12/38) of carbapenemase gene-negative CRE isolates were susceptible to  
49 ceftazidime-avibactam, meropenem-vaborbactam, imipenem-relebactam, and ceftolozane-  
50 tazobactam, respectively. None of the CRE strains were genetically identical. In conclusion, at  
51 this health system in Silicon Valley, carbapenemase-producing CRE occurred sporadically and  
52 were mediated by diverse mechanisms. Nucleic acid testing for *bla*<sub>OXA-48 like</sub>, *bla*<sub>NDM</sub>, *bla*<sub>KPC</sub>,  
53 *bla*<sub>IMP</sub>, and *bla*<sub>VIM</sub> was sufficient to distinguish between carbapenemase-producing and non-

54 producing CRE and accurately predicted susceptibility to ceftazidime-avibactam, meropenem-  
55 vaborbactam and imipenem-relebactam.

56

## 57 **Introduction**

58 Carbapenemase-producing carbapenem-resistant *Enterobacteriaceae* (CP-CRE) have  
59 successfully spread worldwide over the recent decades (1, 2). In some regions, CP-CRE have  
60 become endemic in hospital settings (2). The proportion of CRE in acute-care hospitals in the  
61 U.S. has increased steadily (3, 4). Infection with CRE is associated with increased morbidity and  
62 mortality (5-7). Thus, early diagnosis of CRE infection is essential for timely initiation of  
63 targeted-antimicrobial therapy and early implementation of infection prevention precautions  
64 aimed to prevent nosocomial spread (8, 9).

65 The main mechanisms of resistance to carbapenems in CRE include hydrolysis of carbapenems  
66 by a plasmid-encoded carbapenemase, impaired outer membrane permeability due to inactivation  
67 of particular porins (i.e., OmpC and OmpF in *E. coli* and their analogs) coupled with high-level  
68 expression of cephalosporinases such as AmpC and/or extended spectrum  $\beta$ -lactamase (ESBL),  
69 or a combination of these mechanisms (2, 10). Moreover, CRE commonly encode genetic  
70 determinants of resistance to other classes of antibiotics rendering them pan-resistant (11). The  
71 underlying mechanism of resistance in CRE has prognostic and therapeutic implications for the  
72 newer  $\beta$ -lactam combination drugs that are approved by the FDA (e.g., ceftazidime-avibactam  
73 and meropenem-vaborbactam), and for those in clinical trials (e.g., imipenem-relebactam) (7, 12-  
74 14). For example, *in vitro* studies have shown the ceftazidime-avibactam combination to be  
75 effective against isolates harboring serine carbapenemases such as class A  $\beta$ -lactamases  
76 *Klebsiella pneumoniae* carbapenemase (KPC) and class D  $\beta$ -lactamases OXA-48 but not class B

77 metallo  $\beta$ -lactamases (Verona integron encoded Metallo  $\beta$ -lactamase (VIM), IMP, or New Delhi  
78 Metallo  $\beta$ -lactamase (NDM)) (12). However, metallo  $\beta$ -lactamase-producing CRE are  
79 susceptible to avibactam when combined with aztreonam (13, 14). Thus, it is important to know  
80 both the local prevalence of CRE resistance mechanisms, and the *in vitro* susceptibility to newer  
81  $\beta$ -lactam- $\beta$ -lactamase inhibitor antibiotics.

82  
83 Although the incidence of CRE has been lower on the West Coast of the United States compared  
84 with Eastern States (4), region-specific data are not available and comprehensive phenotypic and  
85 genotypic characterization of CRE isolates in Northern California has not been performed. We  
86 have previously reported sporadic isolation of CP-CRE at our institution (15, 16). The aim of this  
87 study was to comprehensively characterize the mechanism of carbapenem resistance in CRE  
88 isolates at our institution in Silicon Valley over a four-year period and to correlate the underlying  
89 mechanisms of resistance with susceptibility to newer  $\beta$ -lactam- $\beta$ -lactamase inhibitor antibiotics.

90

## 91 **Materials and Methods**

92 **Ethics.** This study was approved by the Stanford University Internal Review Board.

93

94 **CRE isolates.** All consecutive CRE isolates were included from all clinical sources from patients  
95 who received medical care at Stanford Health Care or Lucille Packard Children's Health  
96 between January 2013 and December 2016. Both health systems consist of a tertiary academic  
97 hospital and affiliated clinics but without skilled nursing facilities. Only the first CRE isolate was  
98 included from each patient except for one patient with two strains on presentation. Isolates were  
99 identified by biochemical testing and matrix-assisted laser desorption and ionization time-of-

100 flight mass spectrometry (MALDI-TOF) (Bruker Daltonics, Bremen, Germany). Carbapenem  
101 susceptibility testing was performed prospectively on MicroScan WalkAway plus System  
102 (Beckman Coulter, San Diego, CA) for non-urinary isolates and Vitek 2 (bioMérieux, Durham,  
103 NC) for urinary isolates. Imipenem and meropenem non-susceptible (i.e., intermediate or  
104 resistant) isolates were confirmed using disk diffusion. CRE isolates were prospectively tested  
105 for *bla*<sub>KPC</sub>, *bla*<sub>NDM</sub>, *bla*<sub>IMP</sub>, *bla*<sub>VIM</sub> and *bla*<sub>OXA-48 like</sub> using a laboratory-developed PCR assay and  
106 results were reported to providers. CRE was defined per the pre-2015 Center for Disease Control  
107 (CDC) CRE surveillance definition (17) as nonsusceptibility to imipenem (i.e., MIC > 1 µg/mL)  
108 or meropenem (i.e., MIC > 1 µg/mL), or doripenem (i.e., MIC > 1 µg/mL), and resistance to all  
109 third generation cephalosporins tested except for *Serratia marcescens* expressing *bla*<sub>SME</sub>, which  
110 can be susceptible to third generation cephalosporins.

111

112 **Chart review.** Electronic medical records were reviewed to obtain demographics and clinical  
113 characteristics of patients with CRE infection.

114

115 **Antibiotic susceptibility testing.** The following tests were performed retrospectively for  
116 research purposes. Minimum inhibitory concentrations (MIC) for imipenem, meropenem, and  
117 ertapenem were determined for urinary isolates using the MicroScan WalkAway plus System  
118 (Beckman Coulter) for comparison to non-urine isolates. Susceptibility testing for ceftolozane-  
119 tazobactam and ceftazidime-avibactam was performed by Etest (bioMérieux, Durham, NC) and  
120 meropenem-vaborbactam was performed by MIC test strip (Liofilchem Diagnostici, Teramo,  
121 Italy). Imipenem-relebactam was tested with microbroth dilution method. Relebactam was tested  
122 at a fixed concentration of 4 µg/mL. Interpretation of antimicrobial susceptibility testing results

123 was done according to Clinical and Laboratory Standards Institute (CLSI) criteria (18) except for  
124 imipenem-relebactam and meropenem-vaborbactam which were interpreted using imipenem  
125 CLSI MIC breakpoints and package insert, respectively (18).

126

127 **Genotypic  $\beta$ -lactamase testing.** Isolates were screened for plasmid-encoded ESBL and AmpC  
128 cephalosporinases using the Check-Points CT 103 XL Check-MDR assay (Wageningen, The  
129 Netherlands) per the package instruction. The Check-Points assay detects the following ESBLs:

130 *bla*<sub>CTX-M-1</sub> group, *bla*<sub>CTX-M-1-like</sub>, *bla*<sub>CTX-M-15-like</sub>, *bla*<sub>CTX-M-32-like</sub>, *bla*<sub>CTX-M-2</sub> group, *bla*<sub>CTX-M-8, &-25</sub> group,

131 *bla*<sub>CTX-M-9</sub> group, *bla*<sub>TEM-types</sub>, *bla*<sub>SHV-types</sub>, *bla*<sub>VEB</sub>, *bla*<sub>PER</sub>, *bla*<sub>BEL</sub>, *bla*<sub>GES</sub>; and the following AmpCs:

132 *bla*<sub>CMY I/MOX</sub>, *bla*<sub>ACC</sub>, *bla*<sub>DHA</sub>, *bla*<sub>ACT/MIR</sub>, *bla*<sub>CMY II</sub>, *bla*<sub>FOX</sub>. Detection of carbapenemase genes

133 was carried out using the Xpert Carba-R cartridge (Cepheid, Sunnyvale, CA), which detects

134 *bla*<sub>KPC</sub>, *bla*<sub>NDM</sub>, *bla*<sub>IMP</sub>, *bla*<sub>VIM</sub> and *bla*<sub>OXA-48</sub> like; Check-Points assay which detects additionally

135 *bla*<sub>OXA-23</sub> like, *bla*<sub>OXA-58</sub> like, *bla*<sub>SPM</sub>, *bla*<sub>GES</sub>, and *bla*<sub>GIM</sub>; and three lab-developed multiplexed PCR

136 assays which detect *bla*<sub>SME</sub>, *bla*<sub>SIM</sub>, *bla*<sub>SPM</sub>, *bla*<sub>GES</sub>, *bla*<sub>IMI</sub>, *bla*<sub>NMC-A</sub>, and *bla*<sub>GIM</sub> (Table 1). DNA

137 was extracted by boiling a bacterial colony in molecular-grade water for 10 min. PCR reactions

138 consisted of 2  $\mu$ L of forward and reverse primer to achieve 0.5  $\mu$ M, 5  $\mu$ L of 2 $\times$  FastStart SYBR

139 Green Master mix (Roche Applied Science, Indianapolis, IN), and 3  $\mu$ L of DNA extract. The

140 reactions were run on a Rotor-Gene 6000 real-time cycler (Qiagen, Germantown, MD) with

141 following cycling parameters: 95°C for 5 min and 40 cycles of 95°C for 15 sec, 60°C for 30 sec,

142 and 72°C for 30 sec, followed by melting with ramping from 60°C to 95°C in 0.2°C increments.

143 Melting curve analysis was performed to identify the amplicons (Table S1). Positive controls for

144 each carbapenemase included *bla*<sub>SME</sub>-positive *S. marcescens* MBRL055 and *bla*<sub>IMI</sub>-positive

145 *Enterobacter cloacae* MBRL1077 provided by the Mayo Clinic (Rochester, MN); *bla*<sub>SIM</sub>-

146 positive *Acinetobacter baumannii* YMC 03/9/T104 provided by Yonsei University College of  
147 Medicine (Seoul, South Korea); *bla*<sub>GIM</sub>-positive *E. cloacae* M15 provided by Heinrich Heine  
148 University Düsseldorf (Düsseldorf, Germany); *bla*<sub>NMC-A</sub>-positive *E. cloacae* and *bla*<sub>GES</sub>-positive  
149 *A. baumannii* provided by JMI Laboratories (North Liberty, IA); and 5 *bla*<sub>GES</sub>-positive and 5  
150 *bla*<sub>SPM</sub>-positive *Pseudomonas aeruginosa* isolates provided by Merck (Schaumburg, IL).

151

152 **Carbapenemase activity.** CRE isolates were tested for carbapenemase activity using the  
153 modified carbapenem inactivation method (mCIM) as previously described (19). Isolates with  
154 indeterminate mCIM result were tested for carbapenemase activity (i.e., imipenem degradation)  
155 with MALDI-TOF (Bruker Daltonics) as previously described (20).

156

157 **Porin protein expression.** Levels of OmpC and OmpF in *E. coli* and their analogs in other  
158 species were measured using mass spectrometry (MS). Isolates were cultured overnight in 20 mL  
159 of LB broth shaking at 250 revolutions per min at 37°C. Bacterial pellets were washed in  
160 sodium phosphate buffer (SPB) and resuspended in 0.5 mL of SPB and transferred to O-ring  
161 tubes containing 0.2 mL of 0.1-mm zirconia/silica beads. Bacteria were mechanically disrupted  
162 with three 0.5-min pulses at 2,500 oscillations per min in a Mini-BeadBeater-1 (BioSpec  
163 Products, Bartlesville, OK) with 1-min intervals on ice. The lysates were sedimented two times  
164 for 10 min at 1,500 × g to remove cellular debris. To enrich for membrane proteins, the  
165 supernatants were sedimented two times for 30 min each at 21,000 × g and the second pellet was  
166 resuspended in 45 µL of SPB. Protein concentrations were measured using the Quick Start™  
167 Bradford Protein Assay (Bio Rad, Hercules, CA) and 20 µg was separated on a 10% SDS-PAGE  
168 gel. Gels were stained with Coomassie Brilliant Blue R-250 and protein bands with molecular



169 weight between 31 and 40 kDa were cut and digested with in-gel tryptic digestion kit (Thermo  
170 Scientific, Waltham, MA) per the package insert. Samples were concentrated in thermo savant  
171 iss110 speedvac system (Thermo Scientific) and resuspended in 20  $\mu$ L of 0.1% formic acid in  
172 LC-MS grade water. Tryptic peptides (2  $\mu$ L for each sample) were injected with a nanoAcquity  
173 sample manager (Waters, Milford, MA), trapped for 1 min at 15  $\mu$ L/min on a Symmetry trap  
174 column (Waters), and separated on a 1.7  $\mu$ m particle size BEH C18 column (Waters) by reversed  
175 phase LC using a nanoAcquity binary solvent manager (Waters). A 30 min linear acetonitrile  
176 gradient (3–35%) was applied. Peptides were ionized by nano-ESI using a pico-emitter tip (New  
177 Objective, Woburn, MA) and analyzed by an Impact HD UHR-QTOF mass spectrometer  
178 (Bruker Daltonics) in data-dependent acquisition mode. The acquisition parameters and batch  
179 processing conditions used for DDA have been previously reported (21). Data was analyzed in  
180 PreView (Protein Metrics, San Carlos, CA) using the SwissProt FASTA database entries for  
181 *Enterobacteriaceae* ([www.uniprot.org](http://www.uniprot.org)) to determine the dominant post-translational  
182 modifications and mass calibration parameters. A more specific search was carried out in Byonic  
183 (Protein Metrics, San Carlos, CA) using the TrEMBL database filtered for the taxonomy of the  
184 particular organism under study. MS and MS/MS tolerances were respectively set to 10 and 30  
185 ppm. The main modifications considered were cysteine trioxidation, methionine oxidation and  
186 N-Term acetylation. The protein false detection rate was set to 1% and all matches with less than  
187 2 unique peptides were discarded. The resulting protein lists were then compiled with an R script  
188 (<http://www.R-project.org/>) to classify the identified porin variants based on homology into  
189 OmpC (OmpK36 used for *K. pneumoniae*) and OmpF (OmpK35 for *K. pneumoniae*) categories.  
190 The total intensity of all the MS/MS spectra contributing to peptide identification for each  
191 category was summed. Fold change in relative porin expression was determined by calculating

192 the ratio of each porin in CRE isolates to averaged expression in four pan-sensitive strains of the  
193 same species.

194

195 **Porin RNA expression.** Porin RNA expression was performed on the 39 CRE isolates recovered  
196 between 2013 and 2015 excluding *S. marcescens* isolates and one *E. cloacae* complex. CRE  
197 isolates were cultured in Mueller Hinton broth in the presence of a carbapenem (either  
198 meropenem 2 µg/mL or imipenem 2 µg/mL and if necessary ertapenem 1 µg/mL) at a starting  
199 density  $1 \times 10^5$  CFU/mL and harvested at  $1 \times 10^8$  CFU/mL. RNAprotect Bacteria Reagent (Qiagen)  
200 was added to cultures at a ratio 3:1 and incubated at ambient temperature for 5 min. RNA was  
201 extracted from bacterial pellets and DNase-treated using RNA Extraction Kit and RNase-free  
202 DNase Kit (Qiagen), respectively. cDNA was constructed using the QuantiTect Reverse  
203 Transcription Kit (Qiagen). An identical reaction not treated with reverse transcriptase was  
204 included to control for genomic DNA carryover. Quantitative reverse transcription-PCR (qRT-  
205 PCR) was performed for porin genes (*ompC* and *ompF* in *E. coli* and their analogs in other  
206 species) and the housekeeping gene *rpoB*. qRT-PCR primers are shown in Table S2. Expression  
207 profiling of *ompF* analog in *E. cloacae* and *Citrobacter freundii* was not performed due to lack  
208 of PCR primers. PCR reactions were carried out in 10 µL containing of 0.5 µM of each primer,  
209  $1 \times$  FastStart SYBR Green Master mix, and 3 µL of cDNA. Amplification conditions were as  
210 described above. The specificity of PCR products was confirmed by melting point analysis. The  
211 cDNA copy number of each gene was extrapolated from a standard curve prepared using serial  
212 10-fold dilution of genomic DNA from the respective species. Expression of porin genes was  
213 normalized to *rpoB* in the same sample. Fold change in porin expression was determined by  
214 calculating the ratio of normalized porin expression in CRE isolates to a pan-sensitive control

215 strain of the same species. Each experiment was performed in triplicate, and results were  
216 presented as mean value of three experiments. *E. coli* ATCC 25922, *E. cloacae* ATCC 13047, *E.*  
217 *aerogenes* ATCC 13048, *K. pneumoniae* ATCC13883, and *C. freundii* ATCC 8454 were used as  
218 negative controls and *K. pneumoniae* isolate #404 (22) was used as a positive control for porin  
219 down-regulation.

220

221 **Whole genome sequencing.** Genomic DNA was extracted from bacterial cultures with the  
222 Gentra Puregene Yeast/Bact. Kit (Qiagen) per the manufacturer's instructions. Dual-indexed  
223 sequencing libraries were prepared using the Nextera XT Sample Prep Kit (Illumina, San Diego  
224 CA). Libraries were subjected to 101bp paired-end sequencing on the Illumina HiSeq 4000  
225 platform, to approximately 100× coverage per strain. Sequencing data was demultiplexed by  
226 unique indices. Read quality was assessed using FastQC v0.11.4 (23). Reads were deduplicated  
227 using SuperDeduper v1.4 with the start location in the read at 5 bp (-s 5) and length 50 (-l 50)  
228 (24). Deduplicated reads were then trimmed using TrimGalore v0.4.4, a wrapper for CutAdapt,  
229 with a minimum quality score of 30 for trimming (-q 30), minimum read length of 50 (--length  
230 50) and the "--nextera" flag. Preprocessed reads for each isolate were aligned to the RefSeq  
231 reference genome for the respective species using the Burrows-Wheeler Aligner (BWA) v0.7.10  
232 with default parameters. Pileup files were generated using Samtools v1.5 (25), and Varscan  
233 v2.3.9 was used to identify single nucleotide variants (SNVs) with at least 40× coverage (--min-  
234 coverage 40), 90% frequency (--min-var-freq 0.9), and base quality of at least 20 to support a  
235 base call (--min-avg-qual 20), with the strand filter parameter turned off (--strand-filter 0). (26).  
236 Varscan output was parsed with custom scripts to generate a consensus sequence for each  
237 sample, requiring at least 0.9 frequency to support a SNP or reference base call. SNVs between

238 strain pairs were counted using custom scripts. To build phylogenetic trees, core genome  
239 positions were identified between all strains of a given species. Core genome positions are  
240 defined as genome positions where a base call can be made for each input genome. To permit  
241 multiple sequence alignment, 30,000 SNV positions from each core genome set were randomly  
242 subsampled and concatenated into a FASTA file using custom scripts. Multiple sequence  
243 alignment was performed with MUSCLE v3.8.31, and phylogenetic trees were computed from  
244 the resulting alignments using FastTree v2.1.7 (27, 28). Trees were visualized with FigTree  
245 v1.4.3 (<http://tree.bio.ed.ac.uk/software/figtree/>). An isolate of *E. coli* that was sequenced in two  
246 separate runs was analyzed with this pipeline and shown to yield zero SNVs, as one would  
247 expect for an identical strain. Genome sequences for CRE isolates were deposited in the NCBI  
248 BioSample database (accession numbers SAMN08623777- SAMN08623838)  
249 (<https://www.ncbi.nlm.nih.gov/Traces/study/?acc=SRP133707>).

250  
251 **Statistical Analysis.** Fisher's exact test was used to compare differences in proportions.

252 Statistical analysis was done with the software GraphPad Prism 5.0, San Diego, CA.

253

254

## 255 **Results**

### 256 **CRE rates**

257 Between 2013 and 2016, out of 19,271 non-duplicate *Enterobacteriaceae* cultures with antibiotic  
258 susceptibility results, 62 (0.32%) CRE isolates from 61 patients were identified (Table 1).

259 Demographic and clinical characteristics of patients with CRE isolates are shown in Table 2.

260 Annual CRE rates between 2013 and 2016 did not vary significantly (0.22%, 0.39%, 0.38%, and  
261 0.32%, respectively) (Table 1). CRE species included *Klebsiella pneumoniae* (n=19),

262 *Enterobacter cloacae* complex (n=14), *Escherichia coli* (n=11), *Enterobacter aerogenes* (n=8),  
263 *Serratia marcescens* (n=7), and *Citrobacter freundii* complex (n=3). Carbapenem MICs for CRE  
264 isolates ranged from  $\leq 0.5$  to  $>4$   $\mu\text{g/mL}$  (interquartile range [IQR], 4 to  $>4$ ) for ertapenem,  $\leq 1$  to  
265  $>8$   $\mu\text{g/mL}$  (IQR,  $\leq 1$  to  $>8$ ) for imipenem, and  $\leq 1$  to  $>8$   $\mu\text{g/mL}$  (IQR,  $\leq 1$  to  $>8$ ) for meropenem.

266

### 267 **Genotypic carbapenemase testing**

268 CRE isolates were genotypically tested for previously characterized plasmid-encoded and  
269 chromosomally-encoded carbapenemases using the Xpert Carba-R cartridge, Check-Points  
270 microarray, and a lab-developed multiplexed, real-time PCR assay. A single carbapenemase gene  
271 was detected in 38.7% (24/62) of CRE isolates which consisted of *bla*<sub>OXA-48 like</sub> (n=6), *bla*<sub>NDM</sub>  
272 (n=5), *bla*<sub>KPC</sub> (n=5), *bla*<sub>SME</sub> (n=5), *bla*<sub>IMP</sub> (n=2), and *bla*<sub>VIM</sub> (n=1) (Figure 1 and Table S3). The  
273 bacterial species encoding carbapenemase genes included *E. coli*, *E. cloacae* complex, *K.*  
274 *pneumoniae* and *S. marcescens*. The remaining 61.3% (38/62) of CRE isolates were negative for  
275 *bla*<sub>KPC</sub>, *bla*<sub>NDM</sub>, *bla*<sub>IMP</sub>, *bla*<sub>VIM</sub> and *bla*<sub>OXA-48 like</sub>, *bla*<sub>SME</sub>, *bla*<sub>SIM</sub>, *bla*<sub>SPM</sub>, *bla*<sub>GES</sub>, *bla*<sub>IMI</sub>, *bla*<sub>NMC-A</sub>,  
276 and *bla*<sub>GIM</sub>. The species in this group included *C. freundii* complex, *E. coli*, *E. cloacae* complex,  
277 *E. aerogenes*, *K. pneumoniae* and *S. marcescens*. Annual non-CP-CRE rates between 2013 and  
278 2016 did not vary significantly (63.6%, 50.0%, 61.1%, and 68.4%, respectively). The “SPACE”  
279 organisms that are likely to carry chromosomal AmpC such as *Serratia*, *Citrobacter*, and  
280 *Enterobacter*, made up 63.2% (24/38) of CRE isolates lacking a carbapenemase gene compared  
281 with 33.3% (8/24, p=0.04) of isolates harboring a carbapenemase gene. ESBL and plasmid-  
282 encoded AmpC cephalosporinases were detected with the Check-Points assay in 75.0% (18/24)  
283 and 20.8% (5/24), respectively, of carbapenemase gene-positive and 34.2% (13/38, P=0.004) and  
284 28.9% (11/38, p=0.6), respectively, of carbapenemase gene-negative isolates. Either an ESBL or

285 plasmid-encoded AmpC gene was detected in 79.2% (19/24) of carbapenemase gene-positive  
286 and 60.5% (23/38,  $p=0.2$ ) of carbapenemase gene-negative isolates. All 5 carbapenemase gene-  
287 positive CRE isolates without an ESBL or AmpC gene were *bla*<sub>SME</sub>-positive *S. marcescens*  
288 isolates. Compared with carbapenemase gene-negative CRE, a higher proportion of  
289 carbapenemase gene-positive CRE showed an elevated imipenem and meropenem MIC >8  
290 (15.8% vs. 45.8%,  $p<0.02$ ; 10.5% vs. 58.3%,  $p<0.001$ , respectively) (Figure 2).

291

### 292 **Phenotypic carbapenemase testing**

293 To determine whether carbapenemase gene-negative CRE isolates display carbapenemase  
294 activity (presumably due to previously uncharacterized carbapenemases), we performed a  
295 modified carbapenem inactivation method (mCIM) on all CRE isolates (19). While 100%  
296 (24/24) of carbapenemase gene-positive CRE isolates were mCIM-positive, 86.8% (33/38) of  
297 carbapenemase gene-negative CRE isolates were mCIM-negative, and the remaining 13.2%  
298 (5/38) were mCIM-intermediate. The mCIM-indeterminate isolates were further tested with a  
299 MALDI-TOF-based carbapenemase activity assay (20). All 5 mCIM-indeterminate isolates were  
300 confirmed carbapenemase-negative while all carbapenemase gene-positive CRE isolates  
301 evaluated tested positive for imipenem hydrolysis.

302

### 303 **Porin expression**

304 To determine whether porin expression is lower in CRE isolates without a carbapenemase gene,  
305 a novel mass spectrometry-based assay was employed to measure porin proteins in all 62 CRE  
306 isolates irrespective of their species. As shown in Figure 3B, relative porin levels of OmpC and  
307 OmpF and their analogs was down 2-fold or greater in 54.2% (13/24) and 83.3% (20/24) of

308 carbapenemase gene-positive and 71.1% (27/38, p=0.3) and 81.6% (31/38, p=1.0) of  
309 carbapenemase gene-negative CRE isolates, respectively (Figure 3B and Table S3). The  
310 expression of either OmpC or OmpF and their analogs was decreased in 91.7% (22/24) of  
311 carbapenemase gene-positive CRE isolates compared with 92.1% (35/38, p=1.0) of  
312 carbapenemase gene-negative CRE isolates. The two carbapenemase gene-positive isolates with  
313 normal porin levels were both *blas<sub>SME</sub>*-positive *S. marcescens* (CRE35 and 49); three  
314 carbapenemase gene-negative CRE isolates with normal porin levels were two strains of *E.*  
315 *cloacae* complex (CRE71 and 81), and one *C. freundii* complex (CRE21).  
316 We also performed quantitative reverse transcription-PCR (qRT-PCR) on 39 CRE isolates  
317 recovered between 2013 and 2015 to measure porin mRNA transcripts in CRE isolates. The  
318 expression of *ompC* and *ompF* and their analogs was downregulated 2-fold or more in 11.8%  
319 (2/17) and 26.7% (4/15) of carbapenemase gene-positive CRE isolates compared with 45.5%  
320 (10/22, p=0.04) and 64.7% (11/17, p=0.04) of carbapenemase gene-negative CRE isolates,  
321 respectively. In carbapenemase gene-negative CRE isolates, 63.6% (14/22) showed  
322 downregulation of either *ompC* or *ompF* and their analogs compared with 29.4% (5/17) in  
323 carbapenemase gene-positive CRE (p=0.05) (Figure 3A and Table S3).

324

### 325 **Susceptibility of CRE to newer $\beta$ -lactam/ $\beta$ -lactamases inhibitors**

326 In vitro studies have shown predictable susceptibility of CP-CRE to newer  $\beta$ -lactam/ $\beta$ -lactamase  
327 inhibitor combinations such as imipenem-relebactam, meropenem-vaborbactam, and  
328 ceftazidime-avibactam, depending on the molecular class of the carbapenemases they carry (12-  
329 14). We therefore investigated the susceptibility of CRE isolates to newer  $\beta$ -lactam/ $\beta$ -lactamase  
330 inhibitor combination drugs. Among carbapenemase-positive CRE isolates, 41.7% (10/24),

331 58.3% (14/24) and 66.7% (16/24) were susceptible to imipenem-relebactam, meropenem-  
332 vaborbactam, and ceftazidime-avibactam, respectively (Figure 4 and Table S3). Isolates that  
333 remained resistant to imipenem in the presence of relebactam were positive for class A serine  $\beta$ -  
334 lactamase (*bla<sub>SME</sub>*), class B metallo  $\beta$ -lactamases B (i.e., *bla<sub>NDM</sub>* and *bla<sub>VIM</sub>*), and class D serine  
335  $\beta$ -lactamase (i.e., *bla<sub>OXA-48 like</sub>*). Isolates that remained non-susceptible to meropenem in the  
336 presence of vaborbactam were positive for class B metallo  $\beta$ -lactamases B (i.e., *bla<sub>NDM</sub>*, *bla<sub>IMP</sub>*,  
337 and *bla<sub>VIM</sub>*) and class D serine  $\beta$ -lactamase (i.e., *bla<sub>OXA-48 like</sub>*). All 8 ceftazidime-avibactam-  
338 resistant isolates were positive for class B metallo  $\beta$ -lactamases (i.e., *bla<sub>NDM</sub>*, *bla<sub>IMP</sub>*, and *bla<sub>VIM</sub>*)  
339 (Figure 4 and Table S3). Among carbapenemase gene-negative CRE isolates, 89.5% (34/38),  
340 92.1% (35/38) and 100% (38/38) were susceptible to imipenem-relebactam, meropenem-  
341 vaborbactam and ceftazidime-avibactam, respectively (Figure 4 and Table S3). Three isolates  
342 that were non-susceptible to both imipenem-relebactam and meropenem-vaborbactam included  
343 *E. aerogenes* (CRE09), *E. coli* (CRE15) and *K. pneumoniae* (CRE25) (Table S3). Average  
344 relative porin levels were lower in these isolates compared with imipenem-relebactam and  
345 meropenem-vaborbactam susceptible isolates that were non-susceptible to the carbapenem alone  
346 (0.01 and 0.002 vs. 1.25 and 0.41 for OmpC and OmpF and their analogs, respectively). A *S.*  
347 *marcescens* CRE isolate (CRE05) was non-susceptible to imipenem-relebactam (Table S3).  
348 We also investigated the susceptibility of CRE isolates to ceftolozane-tazobactam. Among  
349 carbapenemase gene-positive CRE, 20.8% (5/24) were susceptible and 16.7% (4/24) were  
350 intermediate to ceftolozane-tazobactam (Figure 4 and Table S3). All 5 susceptible isolates were  
351 *bla<sub>SME</sub>*-positive *S. marcescens*. The 4 intermediate isolates consisted of a *bla<sub>OXA-48 like</sub>*-positive *K.*  
352 *pneumoniae*, a *bla<sub>OXA-48 like</sub>*-positive *E. coli*, a *bla<sub>KPC</sub>*-positive *K. pneumoniae* and a *bla<sub>KPC</sub>*-  
353 positive *E. cloacae complex*. Among carbapenemase gene-negative isolates, 31.6% (12/38) were



354 susceptible and 15.8% (6/38) were intermediate to ceftolozane-tazobactam. There was no  
355 evidence of correlation between resistance to ceftolozane-tazobactam and lower porin protein  
356 levels (95.0% vs. 88.9%;  $p=0.3$ ).

357

### 358 **Molecular epidemiology**

359 Whole genome sequencing was performed to investigate clonality of CRE isolates recovered  
360 between 2013 and 2016. Whole genome sequences were obtained for all CRE isolates excluding  
361 CRE30, which yielded no interpretable results. The only two CRE strains with temporal  
362 association were non-CP-CRE *K. pneumoniae* CRE24 and CRE25 which were isolated on  
363 12/28/2014 and 12/31/2014, respectively, from patients on two different medical wards.

364 Phylogenetic trees constructed based on whole genome sequence analysis are shown in Figure 5.

365 We did not find any identical CRE strains among *C. freundii* complex, *E. cloacae* complex, *E.*  
366 *aerogenes*, *E. coli*, *K. pneumoniae*, and *S. marcescens* isolates (Figure 5). The number of single  
367 nucleotide variants (SNVs) for closely related strains is shown in Table 4. Phylogenetic distance  
368 between strains within a species do not indicate any transmission events, as no identical strains  
369 were observed in our data set. Even the most closely related CRE strains on the phylogenetic tree  
370 (non-CP-CRE *K. pneumoniae* CRE04 isolated on 4/16/2013 and CRE24 isolated on 12/28/2014)  
371 had 5 SNVs. The only two CRE strains with temporal association (CRE24 and CRE25) had 10  
372 SNVs.

373

### 374 **Discussion**

375 Compared to national CRE rates of 4.2% or 1.4%, based on 2011 data submitted to National  
376 Healthcare Safety Network and 2010 data submitted to Surveillance Network-USA (4),

377 respectively, the CRE rate of 0.32% between 2013 and 2016 at our healthcare system serving the  
378 Silicon Valley area was 4 to 13-fold lower, respectively. Although surveillance data in Northern  
379 California is lacking, our CRE rate was also lower than that reported by an academic health  
380 system in Los Angeles, California (0.32% vs. 0.73%) (29). The reason for a lower CRE rate at  
381 our institution could be due to differences in patient population (i.e., less health-care exposure),  
382 differences in infection control and prevention practices (i.e., isolation of patients with CP-CRE),  
383 absence of skilled nursing facilities and long-term-acute-care hospitals from our health system  
384 (30), and the definition used to define CRE. The second difference seems to be critical as CDC  
385 reported at least one CRE infection in 3.9% of short-stay hospitals compared with 17.8% of  
386 long-term-acute-care hospitals (4). Furthermore, in this study we applied the pre-2015 CDC CRE  
387 surveillance definition, which excludes ertapenem. Inclusion of ertapenem would have increased  
388 our CRE rate (17). While the rate of health care-associated infection caused by carbapenem-  
389 nonsusceptible *Enterobacteriaceae* has increased in the U.S between 2001 and 2011 (4), the  
390 annual CRE rates at our institution did not vary significantly over a four-year study period from  
391 2013 to 2016.

392  
393 The CP-CRE rate of 38.7% among all CRE at our institution is comparable to 47.9% reported for  
394 metropolitan areas in 7 U.S. states, including Oregon and Colorado, but much lower than 81.7%  
395 reported by an academic health system in Los Angeles (31). Unlike all other North American  
396 institutions where KPC predominates as the most common carbapenemase among CP-CRE  
397 isolates (7, 29, 31-33), at our institution CP-CRE were evenly caused by KPC (20.8%), OXA-48  
398 like (25.0%), NDM (20.8%), and SME (20.8%), and less commonly by IMP (8.3%) and VIM  
399 (4.2%). The reason for non-predominance of KPC at our health system may be in part due to the

400 geographic location of our institution in the Silicon Valley where high-tech industry draws  
401 people from major cities around the globe where different plasmid-encoded carbapenemases are  
402 endemic. Another important contributor is the fact that nosocomial transmission of KPC did not  
403 occur at our institution during the study period. In fact, whole genome sequence-based strain  
404 typing showed that all plasmid-encoded CP-CRE were distinct strains and therefore had occurred  
405 sporadically. As discussed above, absence of skilled nursing facilities and long-term-acute-care  
406 hospitals from our health system may have contributed to lack of CRE transmission (30).

407  
408 A major strength of study is that we employed comprehensive phenotypic and genotypic  
409 analyses to determine the molecular basis of carbapenem resistance in CRE isolates recovered  
410 longitudinally at our institution. Importantly, concordance between carbapenemase activity and  
411 carbapenemase gene detection was 100%, which indicates genotypic testing would be sufficient  
412 to detect all plasmid-mediated (i.e., *bla*<sub>KPC</sub>, *bla*<sub>OXA-48 like</sub>, *bla*<sub>NDM</sub>, *bla*<sub>IMP</sub>, and *bla*<sub>VIM</sub>) and  
413 chromosomally-encoded (i.e., *bla*<sub>SME</sub>) CP-CRE at our institution. Although FDA-cleared  
414 commercial assays currently do not detect *bla*<sub>SME</sub> (34), this carbapenemase should be suspected  
415 in carbapenem-resistant carbapenemase-producing *S. marcescens* isolates that are negative for  
416 *bla*<sub>KPC</sub>, *bla*<sub>OXA-48 like</sub>, *bla*<sub>NDM</sub>, *bla*<sub>IMP</sub>, and *bla*<sub>VIM</sub> (35). Resistance in non-CP-CRE is mediated  
417 through high-level expression of cephalosporinases such as AmpCs and ESBLs coupled with  
418 porin inactivation (2, 10). Using a novel mass spectrometry assay, we showed porin levels of  
419 either OmpC or OmpF and their analogs was down in 92.1% of non-CP-CRE isolates. Although  
420 only 60.5% of non-CP-CRE encoded an ESBL or AmpC, respectively, the Check-Points assay  
421 does not detect chromosomally-encoded AmpCs present in the “SPACE” organisms (i.e.,  
422 *Serratia*, *Citrobacter*, and *Enterobacter*), which accounted for 63.2% of non-CP-CRE isolates in

423 this study. Overall, between carbapenemase and porin loss detection, we could account for  
424 mechanism of resistance in 95.2% (59/62) of CRE isolates in this study. The mechanism of  
425 resistance in unaccounted isolates may include efflux pump and target modification (36, 37).  
426  
427 The antibiotic susceptibility findings from this study are consistent with prior studies showing  
428 the underlying mechanism of carbapenem resistance predicts *in vitro* susceptibility to newly-  
429 developed  $\beta$ -lactam- $\beta$ -lactamase inhibitor combinations, three of which (i.e., ceftazidime-  
430 avibactam, meropenem-vaborbactam, and ceftolozane-tazobactam) are FDA cleared and  
431 commercially available (12-14, 38). Susceptibility of CP-CRE isolates to ceftazidime-avibactam,  
432 meropenem-vaborbactam, and imipenem-relebactam was dependent on the molecular class of  
433 carbapenemase they encoded such that 100% of isolates encoding *bla*<sub>KPC</sub> were susceptible to  
434 ceftazidime-avibactam, meropenem-vaborbactam and imipenem-relebactam; 100% of isolates  
435 encoding *bla*<sub>OXA-48 like</sub> were susceptible to ceftazidime-avibactam but not to meropenem-  
436 vaborbactam and imipenem-relebactam; and 100% of isolates encoding metallo  $\beta$ -lactamases  
437 (i.e., *bla*<sub>NDM</sub>, *bla*<sub>IMP</sub>, and *bla*<sub>VIM</sub>) were non-susceptible to ceftazidime-avibactam, meropenem-  
438 vaborbactam, and imipenem-relebactam, excluding one *bla*<sub>IMP</sub>-positive isolate that was  
439 susceptible to imipenem alone. In non-CP-CRE isolates, 100%, 92.1%, and 89.5% were  
440 susceptible to ceftazidime-avibactam, meropenem-vaborbactam, and imipenem-relebactam,  
441 respectively. Susceptibility of non-CP-CRE isolates to imipenem-relebactam is consistent with  
442 findings by Livermore and colleagues but not by Lapuebla and colleagues (14, 39). This  
443 discrepancy could be due to extend of porin inactivation among non-CP-CRE isolates in  
444 different studies given that we showed isolates with resistance to imipenem-relebactam had  
445 nearly undetectable porins. Overall, our findings indicate nucleic acid testing for *bla*<sub>KPC</sub>, *bla*<sub>OXA-</sub>

446 48 like, *bla*<sub>NDM</sub>, *bla*<sub>IMP</sub>, and *bla*<sub>VIM</sub> is sufficient to distinguish between CP-CRE and non-CP-CRE  
447 and to accurately predict susceptibility to ceftazidime-avibactam, meropenem-vaborbactam, and  
448 imipenem-relebactam at our institution. Although not developed for treatment of CP-CRE, 100%  
449 of *S. marcescens* encoding *bla*<sub>SME</sub> were susceptible to ceftolozane-tazobactam while the rest of  
450 CP-CRE were resistant or intermediate. Further, 31.6% of non-CP-CRE were susceptible to  
451 ceftolozane-tazobactam, however, genotypic cephalosporinase testing could not identify this  
452 group.

453  
454 Although our findings are informative for management of patients with CRE infection, this study  
455 has several limitations. First, this was a single-center study. Given that patient population,  
456 medical management, and infection control practices vary between health systems, our findings  
457 might not be generalizable. Thus, a multicenter study in our geographic region is needed to  
458 confirm our findings. Second, despite including all CRE isolates at our institution over a 4-year  
459 period, the total number of CRE isolates was relatively small. However, this reflects natural  
460 epidemiology of CRE at our institution. Studies with large number of CRE isolates are needed to  
461 confirm our findings. Third, we compared the susceptibility of CRE isolates to four  $\beta$ -lactam  
462 combination drugs using three different susceptibility testing methods. Although our findings  
463 were consistent with prior reports, using a single susceptibility testing method for all four drugs  
464 might have allowed for more accurate comparison between drugs.

465  
466 In conclusion, comprehensive phenotypic and genotypic characterization of CRE isolates  
467 longitudinally at a health system in Silicon Valley identified diverse resistance mechanisms  
468 including representation of all plasmid-encoded carbapenemases. On demand nucleic acid testing

469 was able to accurately distinguish between CP-CRE and non-CP-CRE and predict *in vitro*  
470 susceptibility to ceftazidime-avibactam, meropenem-vaborbactam, and imipenem-relebactam.

471

## 472 **Acknowledgment**

473 The study was supported by a research grant from Merck Inc to Niaz Banaei. We thank Robin  
474 Patel from the Mayo Clinic, Rochester, MN; Kyungwon Lee from Yonsei University College of  
475 Medicine, Seoul, South Korea; Andreas Wendel from Heinrich Heine University Düsseldorf,  
476 Germany and JMI laboratories, IA for providing bacterial isolates.

477

## 478 **References**

- 479 **1. Munoz-Price, L. S., L. Poirel, R. A. Bonomo, M. J. Schwaber, G. L. Daikos, M.**  
480 **Cormican, G. Cornaglia, J. Garau, M. Gniadkowski, M. K. Hayden, K. Kumarasamy, D.**  
481 **M. Livermore, J. J. Maya, P. Nordmann, J. B. Patel, D. L. Paterson, J. Pitout, M. V.**  
482 **Villegas, H. Wang, N. Woodford, and J. P. Quinn.** 2013. Clinical epidemiology of the global  
483 expansion of *Klebsiella pneumoniae* carbapenemases. *Lancet Infect. Dis.* **13**:785-796.
- 484 **2. Temkin, E., A. Adler, A. Lerner, and Y. Carmeli.** 2014. Carbapenem-resistant  
485 *Enterobacteriaceae*: biology, epidemiology, and management. *Ann. N. Y. Acad. Sci.* **1323**:22-  
486 42.
- 487 **3. Guh, A. Y., B. M. Limbago, and A. J. Kallen.** 2014. Epidemiology and prevention of  
488 carbapenem-resistant *Enterobacteriaceae* in the United States. *Expert Rev. Anti Infect. Ther.*  
489 **12**:565-580.
- 490 **4. Centers for Disease Control and Prevention (CDC).** 2013. Vital signs: carbapenem-  
491 resistant *Enterobacteriaceae*. *MMWR Morb. Mortal. Wkly. Rep.* **62**:165-170.

- 492 5. **Qureshi, Z. A., D. L. Paterson, B. A. Potoski, M. C. Kilayko, G. Sandovsky, E. Sordillo,**  
493 **B. Polsky, J. M. Adams-Haduch, and Y. Doi.** 2012. Treatment outcome of bacteremia due to  
494 KPC-producing *Klebsiella pneumoniae*: superiority of combination antimicrobial regimens.  
495 *Antimicrob. Agents Chemother.* **56**:2108-2113.
- 496 6. **Tzouvelekis, L. S., A. Markogiannakis, E. Piperaki, M. Souli, and G. L. Daikos.** 2014.  
497 Treating infections caused by carbapenemase-producing *Enterobacteriaceae*. *Clin. Microbiol.*  
498 *Infect.* **20**:862-872.
- 499 7. **Tamma, P. D., K. E. Goodman, A. D. Harris, T. Tekle, A. Roberts, A. Taiwo, and P. J.**  
500 **Simner.** 2017. Comparing the Outcomes of Patients With Carbapenemase-Producing and Non-  
501 Carbapenemase-Producing Carbapenem-Resistant *Enterobacteriaceae* Bacteremia. *Clin. Infect.*  
502 *Dis.* **64**:257-264.
- 503 8. **Falagas, M. E., P. Lourida, P. Poulikakos, P. I. Rafailidis, and G. S. Tansarli.** 2014.  
504 Antibiotic treatment of infections due to carbapenem-resistant *Enterobacteriaceae*: systematic  
505 evaluation of the available evidence. *Antimicrob. Agents Chemother.* **58**:654-663.
- 506 9. **Palmore, T. N., and D. K. Henderson.** 2013. Managing transmission of carbapenem-resistant  
507 *Enterobacteriaceae* in healthcare settings: a view from the trenches. *Clin. Infect. Dis.* **57**:1593-  
508 1599.
- 509 10. **Tzouvelekis, L. S., A. Markogiannakis, M. Psychogiou, P. T. Tassios, and G. L. Daikos.**  
510 2012. Carbapenemases in *Klebsiella pneumoniae* and other *Enterobacteriaceae*: an evolving  
511 crisis of global dimensions. *Clin. Microbiol. Rev.* **25**:682-707.
- 512 11. **Elemam, A., J. Rahimian, and W. Mandell.** 2009. Infection with panresistant *Klebsiella*  
513 *pneumoniae*: a report of 2 cases and a brief review of the literature. *Clin. Infect. Dis.* **49**:271-274.

- 514 12. **Vasoo, S., S. A. Cunningham, N. C. Cole, P. C. Kohner, S. R. Menon, K. M. Krause, K.**  
515 **A. Harris, P. P. De, T. H. Koh, and R. Patel.** 2015. In Vitro Activities of Ceftazidime-  
516 Avibactam, Aztreonam-Avibactam, and a Panel of Older and Contemporary Antimicrobial  
517 Agents against Carbapenemase-Producing Gram-Negative Bacilli. *Antimicrob. Agents*  
518 *Chemother.* **59**:7842-7846.
- 519 13. **Lob, S. H., M. A. Hackel, K. M. Kazmierczak, K. Young, M. R. Motyl, J. A. Karlowsky,**  
520 **and D. F. Sahn.** 2017. In Vitro Activity of Imipenem-Relebactam against Gram-Negative  
521 ESKAPE Pathogens Isolated by Clinical Laboratories in the United States in 2015 (Results from  
522 the SMART Global Surveillance Program). *Antimicrob. Agents Chemother.* **61**:10.
- 523 14. **Lapuebla, A., M. Abdallah, O. Olafisoye, C. Cortes, C. Urban, D. Landman, and J.**  
524 **Quale.** 2015. Activity of Imipenem with Relebactam against Gram-Negative Pathogens from  
525 New York City. *Antimicrob. Agents Chemother.* **59**:5029-5031.
- 526 15. **Green, D. A., N. Srinivas, N. Watz, F. C. Tenover, M. Amieva, and N. Banaei.** 2013. A  
527 pediatric case of New Delhi metallo-beta-lactamase-1-producing *Enterobacteriaceae* in the  
528 United States. *Pediatr. Infect. Dis. J.* **32**:1291-1294.
- 529 16. **Limbago, B. M., J. K. Rasheed, K. F. Anderson, W. Zhu, B. Kitchel, N. Watz, S.**  
530 **Munro, H. Gans, N. Banaei, and A. J. Kallen.** 2011. IMP-producing carbapenem-resistant  
531 *Klebsiella pneumoniae* in the United States. *J. Clin. Microbiol.* **49**:4239-4245.
- 532 17. **Chea, N., S. N. Bulens, T. Kongphet-Tran, R. Lynfield, K. M. Shaw, P. S. Vagnone, M.**  
533 **A. Kainer, D. B. Muleta, L. Wilson, E. Vaeth, G. Dumyati, C. Concannon, E. C. Phipps, K.**  
534 **Culbreath, S. J. Janelle, W. M. Bamberg, A. Y. Guh, B. Limbago, and A. J. Kallen.** 2015.  
535 Improved Phenotype-Based Definition for Identifying Carbapenemase Producers among  
536 Carbapenem-Resistant *Enterobacteriaceae*. *Emerg. Infect. Dis.* **21**:1611-1616.



- 537 18. **Anonymous** 2016. Clinical and Laboratory Standards Institute. Performance standards for  
538 antimicrobial susceptibility testing: twenty-sixth informational supplement. Wayne (PA): The  
539 Institute. **M100-S26**.
- 540 19. **Pierce, V. M., P. J. Simner, D. R. Lonsway, D. E. Roe-Carpenter, J. K. Johnson, W. B.**  
541 **Brasso, A. M. Bobenchik, Z. C. Lockett, A. Charnot-Katsikas, M. J. Ferraro, R. B. J.**  
542 **Thomson, S. G. Jenkins, B. M. Limbago, and S. Das.** 2017. The Modified Carbapenem  
543 Inactivation Method (mCIM) for Phenotypic Detection of Carbapenemase Production among  
544 *Enterobacteriaceae*. J Clin Microbiol. **55**:2321-2333.
- 545 20. **Lasserre, C., L. De Saint Martin, G. Cuzon, P. Bogaerts, E. Lamar, Y. Glupczynski, T.**  
546 **Naas, and D. Tande.** 2015. Efficient Detection of Carbapenemase Activity in  
547 *Enterobacteriaceae* by Matrix-Assisted Laser Desorption Ionization-Time of Flight Mass  
548 Spectrometry in Less Than 30 Minutes. J. Clin. Microbiol. **53**:2163-2171.
- 549 21. **Kultz, D., J. Li, X. Zhang, F. Villarreal, T. Pham, and D. Paguio.** 2015. Population-  
550 specific plasma proteomes of marine and freshwater three-spined sticklebacks (*Gasterosteus*  
551 *aculeatus*). Proteomics. **15**:3980-3992.
- 552 22. **Hong, J. H., C. J. Clancy, S. Cheng, R. K. Shields, L. Chen, Y. Doi, Y. Zhao, D. S.**  
553 **Perlin, B. N. Kreiswirth, and M. H. Nguyen.** 2013. Characterization of porin expression in  
554 *Klebsiella pneumoniae* Carbapenemase (KPC)-producing *K. pneumoniae* identifies isolates most  
555 susceptible to the combination of colistin and carbapenems. Antimicrob. Agents Chemother.  
556 **57**:2147-2153.
- 557 23. **Andrews, S.** 2010. FastQC: a quality control tool for high throughput sequence data.

- 558 24. **Petersen, K. R., D. A. Streett, A. T. Gerritsen, S. S. Hunter, and M. L. Settles.** 2015.  
559 Super Deduper, Fast PCR Duplicate Detection in Fastq Files., p. 491. Proceedings of the 6th  
560 ACM Conference on Bioinformatics, Computational Biology and Health Informatics.
- 561 25. **Li, H., B. Handsaker, A. Wysoker, T. Fennell, J. Ruan, N. Homer, G. Marth, G.**  
562 **Abecasis, R. Durbin, and 1000 Genome Project Data Processing Subgroup.** 2009. The  
563 Sequence Alignment/Map format and SAMtools. *Bioinformatics.* **25**:2078-2079.
- 564 26. **Koboldt, D. C., Q. Zhang, D. E. Larson, D. Shen, M. D. McLellan, L. Lin, C. A. Miller,**  
565 **E. R. Mardis, L. Ding, and R. K. Wilson.** 2012. VarScan 2: somatic mutation and copy number  
566 alteration discovery in cancer by exome sequencing. *Genome Res.* **22**:568-576.
- 567 27. **Edgar, R. C.** 2004. MUSCLE: multiple sequence alignment with high accuracy and high  
568 throughput. *Nucleic Acids Research.* **32**, **5**:1792-1797.
- 569 28. **Price, M. N., P. S. Dehal, and A. P. Arkin.** 2010. Approximately Maximum-Likelihood  
570 Trees for Large Alignments. *PloS One.* **5**, **3**:e9490.
- 571 29. **Pollett, S., S. Miller, J. Hindler, D. Uslan, M. Carvalho, and R. Humphries.** 2014.  
572 Phenotypic and molecular characteristics of carbapenem-resistant *Enterobacteriaceae* in a health  
573 care system in Los Angeles, California, from 2011 to 2013. *J Clin Microbiol.* **52**:4003-4009.
- 574 30. **Mathers, A. J., H. L. Cox, B. Kitchel, H. Bonatti, A. K. Brassinga, J. Carroll, W. M.**  
575 **Scheld, K. C. Hazen, and C. D. Sifri.** 2011. Molecular dissection of an outbreak of  
576 carbapenem-resistant *Enterobacteriaceae* reveals Intergenous KPC carbapenemase transmission  
577 through a promiscuous plasmid. *Mbio.* **2**:e00204-11.
- 578 31. **Guh, A. Y., S. N. Bulens, Y. Mu, J. T. Jacob, J. Reno, J. Scott, L. E. Wilson, E. Vaeth,**  
579 **R. Lynfield, K. M. Shaw, P. M. Vagnone, W. M. Bamberg, S. J. Janelle, G. Dumyati, C.**  
580 **Concannon, Z. Beldavs, M. Cunningham, P. M. Cassidy, E. C. Phipps, N. Kenslow, T.**

- 581 **Travis, D. Lonsway, J. K. Rasheed, B. M. Limbago, and A. J. Kallen.** 2015. Epidemiology of  
582 Carbapenem-Resistant *Enterobacteriaceae* in 7 US Communities, 2012-2013. *Jama*. **314**:1479-  
583 1487.
- 584 32. **Castanheira, M., L. M. Deshpande, J. C. Mills, R. N. Jones, R. Soave, S. G. Jenkins, and**  
585 **A. N. Schuetz.** 2016. *Klebsiella pneumoniae* Isolate from a New York City Hospital Belonging  
586 to Sequence Type 258 and Carrying blaKPC-2 and blaVIM-4. *Antimicrob. Agents Chemother.*  
587 **60**:1924-1927.
- 588 33. **Mataseje, L. F., K. Abdesselam, J. Vachon, R. Mitchel, E. Bryce, D. Roscoe, D. A. Boyd,**  
589 **J. Embree, K. Katz, P. Kibsey, A. E. Simor, G. Taylor, N. Turgeon, J. Langley, D. Gravel,**  
590 **K. Amaratunga, and M. R. Mulvey.** 2016. Results from the Canadian Nosocomial Infection  
591 Surveillance Program on Carbapenemase-Producing *Enterobacteriaceae*, 2010 to 2014.  
592 *Antimicrob. Agents Chemother.* **60**:6787-6794.
- 593 34. **Findlay, J., K. L. Hopkins, D. Meunier, and N. Woodford.** 2015. Evaluation of three  
594 commercial assays for rapid detection of genes encoding clinically relevant carbapenemases in  
595 cultured bacteria. *J. Antimicrob. Chemother.* **70**:1338-1342.
- 596 35. **Queenan, A. M., C. Torres-Viera, H. S. Gold, Y. Carmeli, G. M. Eliopoulos, R. C.**  
597 **Moellering Jr, J. P. Quinn, J. Hindler, A. A. Medeiros, and K. Bush.** 2000. SME-type  
598 carbapenem-hydrolyzing class A beta-lactamases from geographically diverse *Serratia*  
599 *marcescens* strains. *Antimicrob. Agents Chemother.* **44**:3035-3039.
- 600 36. **Grobner, S., D. Linke, W. Schutz, C. Fladerer, J. Madlung, I. B. Autenrieth, W. Witte,**  
601 **and Y. Pfeifer.** 2009. Emergence of carbapenem-non-susceptible extended-spectrum beta-  
602 lactamase-producing *Klebsiella pneumoniae* isolates at the university hospital of Tübingen,  
603 Germany. *J. Med. Microbiol.* **58**:912-922.

- 604 37. Szabo, D., F. Silveira, A. M. Hujer, R. A. Bonomo, K. M. Hujer, J. W. Marsh, C. R.  
605 Bethel, Y. Doi, K. Deeley, and D. L. Paterson. 2006. Outer membrane protein changes and  
606 efflux pump expression together may confer resistance to ertapenem in *Enterobacter cloacae*.  
607 Antimicrob. Agents Chemother. **50**:2833-2835.
- 608 38. Castanheira, M., M. D. Huband, R. E. Mendes, and R. K. Flamm. 2017. Meropenem-  
609 Vaborbactam Tested against Contemporary Gram-Negative Isolates Collected Worldwide during  
610 2014, Including Carbapenem-Resistant, KPC-Producing, Multidrug-Resistant, and Extensively  
611 Drug-Resistant *Enterobacteriaceae*. Antimicrob. Agents Chemother. **61**:10.
- 612 39. Livermore, D. M., M. Warner, and S. Mushtaq. 2013. Activity of MK-7655 combined  
613 with imipenem against *Enterobacteriaceae* and *Pseudomonas aeruginosa*. J. Antimicrob.  
614 Chemother. **68**:2286-2290.
- 615

616 **Figure Legends**

617 **Figure 1. Carbapenemase genes detected in CRE isolates annually from 2013 to 2016.**

618 Carbapenemase genes tested include *bla*<sub>KPC</sub>, *bla*<sub>NDM</sub>, *bla*<sub>IMP</sub>, *bla*<sub>VIM</sub>, *bla*<sub>OXA-48 like</sub>, *bla*<sub>SME</sub>, *bla*<sub>SIM</sub>,  
619 *bla*<sub>SPM</sub>, *bla*<sub>GES</sub>, *bla*<sub>IMI</sub>, *bla*<sub>NMC-A</sub>, and *bla*<sub>GIM</sub>.

620

621 **Figure 2. Distribution of imipenem and meropenem MICs in CRE isolates with and**

622 **without a carbapenemase gene.** Bars show percentage of imipenem (A) and meropenem (B)

623 MICs for carbapenemase gene-negative (CARBase gene -; green bars) and carbapenemase gene-  
624 positive (CARBase gene +; blue bars) CRE isolates.

625

626 **Figure 3. Porin protein and mRNA levels in CRE isolates with and without a**

627 **carbapenemase gene.** Bars show percentage of carbapenemase gene-positive (CARBase gene +)

628 and gene-negative (CARBase gene -) CRE isolates with relative protein (A) and porin mRNA  
629 (B) down 2-fold or more compared with susceptible isolates.

630

631 **Figure 4. Susceptibility of CRE isolates to imipenem-relebactam, meropenem-**

632 **vaborbactam, ceftazidime-avibactam, and ceftolozane-tazobactam.** Bars show percent

633 susceptibility of carbapenemase gene-positive (CARBase gene +) and gene-negative (CARBase  
634 gene -) CRE to (A) imipenem-relebactam, (C) meropenem-vaborbactam, (E) ceftazidime-

635 avibactam, and (G) ceftolozane-tazobactam. Graphs on the right (B, D, F, H) show fraction of

636 carbapemase genes detected in carbapenemase gene-positive isolates that are susceptible,

637 intermediate, or resistant to the respective antibiotic combination.

638

639 **Figure 5. Phylogenetic tree for CRE isolates based on whole genome sequencing.**

640 Phylogenetic trees were computed from multiple sequence alignments of concatenated SNVs on

641 a per-species basis. Scale bars show evolutionary distances.

642 **Table 1. Annual CRE rates at Stanford Health Care**

| Species                             | No. of CRE/CRE + non-CRE isolates (%) |               |               |               |                |
|-------------------------------------|---------------------------------------|---------------|---------------|---------------|----------------|
|                                     | 2013                                  | 2014          | 2015          | 2016          | 2013-16        |
| <i>Citrobacter freundii</i> complex | 0/120 (0)                             | 2/81 (2.5)    | 0/93 (0)      | 1/108 (0.9)   | 3/402 (0.7)    |
| <i>Citrobacter koseri</i>           | 0/68 (0)                              | 0/54 (0)      | 0/71 (0)      | 0/74 (0)      | 0/267 (0)      |
| <i>Enterobacter aerogenes</i>       | 2/122 (1.6)                           | 1/92 (1.1)    | 4/104 (3.8)   | 1/115 (0.9)   | 8/433 (1.8)    |
| <i>Enterobacter cloacae</i> complex | 3/240 (1.3)                           | 0/226 (0)     | 3/239 (1.3)   | 8/289 (2.8)   | 14/994 (1.4)   |
| <i>Escherichia coli</i>             | 1/3117 (0)                            | 4/2080 (0.2)  | 2/3008 (0.1)  | 4/3834 (0.1)  | 11/12039 (0.1) |
| <i>Klebsiella oxytoca</i>           | 0/167 (0)                             | 0/129 (0)     | 0/127 (0)     | 0/160 (0)     | 0/583 (0)      |
| <i>Klebsiella pneumoniae</i>        | 4/631 (0.6)                           | 7/503 (1.4)   | 7/565 (1.2)   | 1/824 (0.1)   | 19/2523 (0.8)  |
| <i>Morganella morganii</i>          | 0/58 (0)                              | 0/47 (0)      | 0/60 (0)      | 0/66 (0)      | 0/231 (0)      |
| <i>Proteus mirabilis</i>            | 0/245 (0)                             | 0/178 (0)     | 0/288 (0)     | 0/306 (0)     | 0/1017 (0)     |
| <i>Proteus vulgaris</i>             | 0/16 (0)                              | 0/13 (0)      | 0/11 (0)      | 0/12 (0)      | 0/52 (0)       |
| <i>Salmonella enterica</i>          | 0/56 (0)                              | 0/34 (0)      | 0/29 (0)      | 0/37 (0)      | 0/156 (0)      |
| <i>Serratia marcescens</i>          | 1/161 (0.6)                           | 0/113 (0)     | 2/157 (1.3)   | 4/143 (2.8)   | 7/574 (1.2)    |
| All species                         | 11/5001 (0.2)                         | 14/3550 (0.4) | 18/4752 (0.4) | 19/5968 (0.3) | 62/19271 (0.3) |

643

644 **Table 2. Demographics and clinical characteristics of patients with CRE infection**

| Characteristic               | No. (%)<br>(n=61) |
|------------------------------|-------------------|
| Female                       | 25 (41)           |
| Age - Median (range)         | 56 (1-86)         |
| Inpatient                    | 34 (55.7)         |
| <b>Comorbidities</b>         |                   |
| Immunosuppression            | 33 (54)           |
| Solid-tumor malignancy       | 13 (21.3)         |
| Solid organ transplant       | 11 (18)           |
| Hematological-malignancy     | 8 (13.1)          |
| HSCT                         | 1 (1.6)           |
| HIV-AIDS                     | 0 (0)             |
| Diabetes                     | 12 (19.6)         |
| Congestive Heart Failure     | 10 (16.4)         |
| Cirrhosis                    | 4 (6.5)           |
| Structural lung disease      | 4 (6.5)           |
| Major surgery within 30 days | 4 (6.5)           |
| Prematurity                  | 1 (1.6)           |
| No comorbidities             | 7 (11.5)          |
| <b>Specimen source</b>       |                   |
| Urinary tract                | 24 (39.3)         |
| Blood                        | 12 (19.7)         |
| Intra-abdominal              | 8 (13.1)          |
| Lower respiratory tract      | 7 (11.5)          |
| Osteoarticular               | 4 (6.5)           |
| Biliary tract                | 2 (3.3)           |
| Skin-soft tissue             | 2 (3.3)           |
| Genital                      | 1 (1.6)           |
| Rrespiratory sinus           | 1 (1.6)           |

645

646 HSCT, Hematopoietic Stem Cell Transplant

647

648

649



650 **Table 3. Antimicrobial susceptibility of CRE isolates**

| Antimicrobial Agent                       | No. (%) of susceptible isolates |                          |               |                                            |                                    |                                    |                                    |                                    |                                    |
|-------------------------------------------|---------------------------------|--------------------------|---------------|--------------------------------------------|------------------------------------|------------------------------------|------------------------------------|------------------------------------|------------------------------------|
|                                           | All CRE<br>(n=62)               | Non-CP-<br>CRE<br>(n=38) | CP-CRE (n=24) |                                            |                                    |                                    |                                    |                                    |                                    |
|                                           |                                 |                          | All<br>CP-CRE | <i>bla</i> <sub>OXA-48 like</sub><br>(n=6) | <i>bla</i> <sub>KPC</sub><br>(n=5) | <i>bla</i> <sub>NDM</sub><br>(n=5) | <i>bla</i> <sub>IMP</sub><br>(n=2) | <i>bla</i> <sub>VIM</sub><br>(n=1) | <i>bla</i> <sub>SME</sub><br>(n=5) |
| <b>Carbapenems</b>                        |                                 |                          |               |                                            |                                    |                                    |                                    |                                    |                                    |
| Imipenem                                  | 21 (33.9)                       | 16 (42.1)                | 5 (20.8)      | 3 (50)                                     | 0 (0)                              | 0 (0)                              | 2 (100)                            | 0 (0)                              | 0 (0)                              |
| Meropenem                                 | 21 (33.9)                       | 17 (44.7)                | 4 (16.7)      | 4 (66.7)                                   | 0 (0)                              | 0 (0)                              | 0 (0)                              | 0 (0)                              | 0 (0)                              |
| Ertapenem                                 | 4 (6.5)                         | 3 (7.9)                  | 1 (4.2)       | 1 (16.7)                                   | 0 (0)                              | 0 (0)                              | 0 (0)                              | 0 (0)                              | 0 (0)                              |
| <b>Monobactams</b>                        |                                 |                          |               |                                            |                                    |                                    |                                    |                                    |                                    |
| Aztreonam                                 | 8 (12.9)                        | 3 (7.9)                  | 5 (20.8)      | 0 (0)                                      | 0 (0)                              | 1 (20)                             | 0 (0)                              | 1 (100)                            | 3 (60)                             |
| <b>Cephems</b>                            |                                 |                          |               |                                            |                                    |                                    |                                    |                                    |                                    |
| Ceftriaxone                               | 5 (8.1)                         | 0 (0)                    | 5 (20.8)      | 0 (0)                                      | 0 (0)                              | 0 (0)                              | 0 (0)                              | 0 (0)                              | 5 (100)                            |
| Ceftazidime                               | 7 (11.3)                        | 2 (5.3)                  | 5 (20.8)      | 1 (16.7)                                   | 0 (0)                              | 0 (0)                              | 0 (0)                              | 0 (0)                              | 4 (80)                             |
| Cefepime                                  | 25 (40.3)                       | 18 (47.4)                | 7 (29.2)      | 1 (16.7)                                   | 1 (20)                             | 0 (0)                              | 0 (0)                              | 0 (0)                              | 5 (100)                            |
| <b>β-lactamase inhibitor combinations</b> |                                 |                          |               |                                            |                                    |                                    |                                    |                                    |                                    |
| Piperacillin-tazobactam                   | 12 (19.4)                       | 8 (21.1)                 | 4 (16.7)      | 0 (0)                                      | 0 (0)                              | 0 (0)                              | 0 (0)                              | 0 (0)                              | 4 (80)                             |
| Ceftolozane-tazobactam                    | 17 (27.4)                       | 12 (31.6)                | 5 (20.8)      | 0 (0)                                      | 0 (0)                              | 0 (0)                              | 0 (0)                              | 0 (0)                              | 5 (100)                            |
| Ceftazidime-avibactam                     | 54 (87.1)                       | 38 (100)                 | 16 (66.7)     | 6 (100)                                    | 5 (100)                            | 0 (0)                              | 0 (0)                              | 0 (0)                              | 5 (100)                            |
| Imipenem-relebactam                       | 44 (71)                         | 34 (89.5)                | 10 (41.7)     | 3 (50)                                     | 5 (100)                            | 0 (0)                              | 2 (100)                            | 0 (0)                              | 0 (0)                              |
| Meropenem-vaborbactam                     | 49 (79)                         | 35 (92.1)                | 14 (60)       | 4 (66.7)                                   | 5 (100)                            | 0 (0)                              | 0 (0)                              | 0 (0)                              | 5 (100)                            |
| <b>Fluoroquinolones</b>                   |                                 |                          |               |                                            |                                    |                                    |                                    |                                    |                                    |
| Ciprofloxacin                             | 33 (53.2)                       | 24 (63.2)                | 9 (37.5)      | 0 (0)                                      | 3 (60)                             | 0 (0)                              | 0 (0)                              | 1 (100)                            | 5 (100)                            |
| Levofloxacin                              | 35 (56.5)                       | 26 (68.4)                | 9 (37.5)      | 0 (0)                                      | 3 (60)                             | 0 (0)                              | 0 (0)                              | 1 (100)                            | 5 (100)                            |
| <b>Aminoglycosides</b>                    |                                 |                          |               |                                            |                                    |                                    |                                    |                                    |                                    |
| Gentamicin                                | 41 (66.1)                       | 33 (86.8)                | 8 (33.3)      | 1 (16.7)                                   | 2 (40)                             | 0 (0)                              | 0 (0)                              | 0 (0)                              | 5 (100)                            |
| Tobramycin                                | 36 (58.1)                       | 27 (71.1)                | 9 (37.5)      | 2 (33.3)                                   | 1 (20)                             | 0 (0)                              | 1 (50)                             | 0 (0)                              | 5 (100)                            |
| Amikacin                                  | 50 (80.6)                       | 35 (92.11)               | 15 (62.5)     | 5 (83.3)                                   | 3 (60)                             | 0 (0)                              | 1 (50)                             | 1 (100)                            | 5 (100)                            |
| Tigecycline                               | 54 (87.1)                       | 34 (89.5)                | 20 (83.3)     | 4 (66.7)                                   | 5 (100)                            | 5 (100)                            | 0 (0)                              | 1 (100)                            | 5 (100)                            |
| Trimethoprim/Sulfamethoxazole             | 35 (56.5)                       | 27 (71.1)                | 8 (33.3)      | 0 (0)                                      | 1 (20)                             | 1 (20)                             | 1 (50)                             | 0 (0)                              | 5 (100)                            |

651

652 non-CP, non-carbapenemase producing; CP, carbapenemase producing

653

654

655

656

657

658

659

660

661 **Table 4. Single nucleotide variants (SNVs) of related CRE strains**

| Isolate ID No. | Species              | Collection Date | Carbapenemase gene               | SNVs |
|----------------|----------------------|-----------------|----------------------------------|------|
| CRE50          | <i>E. coli</i>       | 2/1/2016        | Negative                         | 136  |
| CRE75          |                      | 8/16/2016       | Negative                         |      |
| CRE17          | <i>E. coli</i>       | 10/15/2014      | <i>bla<sub>NDM</sub></i>         | 1527 |
| CRE87          |                      | 11/13/2016      | <i>bla<sub>NDM</sub></i>         |      |
| CRE04          | <i>K. pneumoniae</i> | 4/6/2013        | Negative                         | 5    |
| CRE24          |                      | 12/28/2014      | Negative                         |      |
| CRE04          | <i>K. pneumoniae</i> | 4/6/2013        | Negative                         | 7    |
| CRE25          |                      | 12/31/2014      | Negative                         |      |
| CRE24          | <i>K. pneumoniae</i> | 12/28/2014      | Negative                         | 10   |
| CRE25          |                      | 12/31/2014      | Negative                         |      |
| CRE08          | <i>K. pneumoniae</i> | 8/2/2013        | <i>bla<sub>OXA-48 like</sub></i> | 1907 |
| CRE18          |                      | 10/19/2014      | <i>bla<sub>NDM</sub></i>         |      |
| CRE22          | <i>K. pneumoniae</i> | 11/19/2014      | Negative                         | 163  |
| CRE43          |                      | 12/24/2015      | <i>bla<sub>KPC</sub></i>         |      |
| CRE35          | <i>S. marcescens</i> | 9/2/2015        | <i>bla<sub>SME</sub></i>         | 30   |
| CRE49          |                      | 1/27/2016       | <i>bla<sub>SME</sub></i>         |      |
| CRE35          | <i>S. marcescens</i> | 9/2/2015        | <i>bla<sub>SME</sub></i>         | 40   |
| CRE94          |                      | 12/5/2016       | <i>bla<sub>SME</sub></i>         |      |
| CRE49          | <i>S. marcescens</i> | 1/27/2016       | <i>bla<sub>SME</sub></i>         | 40   |
| CRE94          |                      | 12/5/2016       | <i>bla<sub>SME</sub></i>         |      |
| CRE39          | <i>E. aerogenes</i>  | 10/30/2015      | Negative                         | 1258 |
| CRE41          |                      | 11/18/2015      | Negative                         |      |
| CRE09          | <i>E. aerogenes</i>  | 8/23/2013       | Negative                         | 176  |
| CRE77          |                      | 8/30/2016       | Negative                         |      |
| CRE54          | <i>E. cloacae</i>    | 3/1/2016        | Negative                         | 55   |
| CRE71          |                      | 8/25/2016       | Negative                         |      |

662

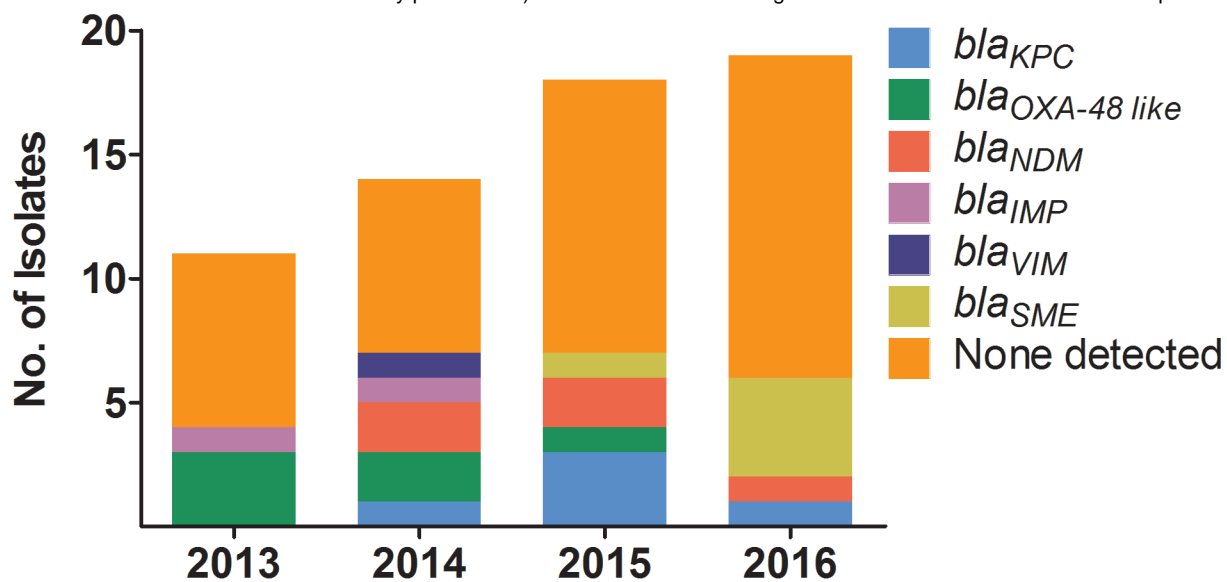

**Figure 1. Carbapenemase genes detected in CRE isolates annually from 2013 to 2016.**

Carbapenemase genes tested include *bla*<sub>KPC</sub>, *bla*<sub>NDM</sub>, *bla*<sub>IMP</sub>, *bla*<sub>VIM</sub>, *bla*<sub>OXA-48 like</sub>, *bla*<sub>SME</sub>, *bla*<sub>SIM</sub>, *bla*<sub>SPM</sub>, *bla*<sub>GES</sub>, *bla*<sub>IMI</sub>, *bla*<sub>NMC-A</sub>, and *bla*<sub>GIM</sub>.

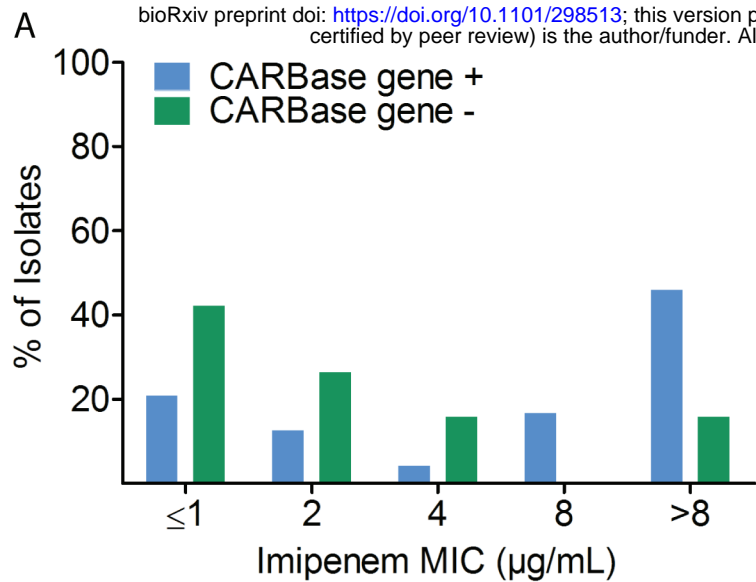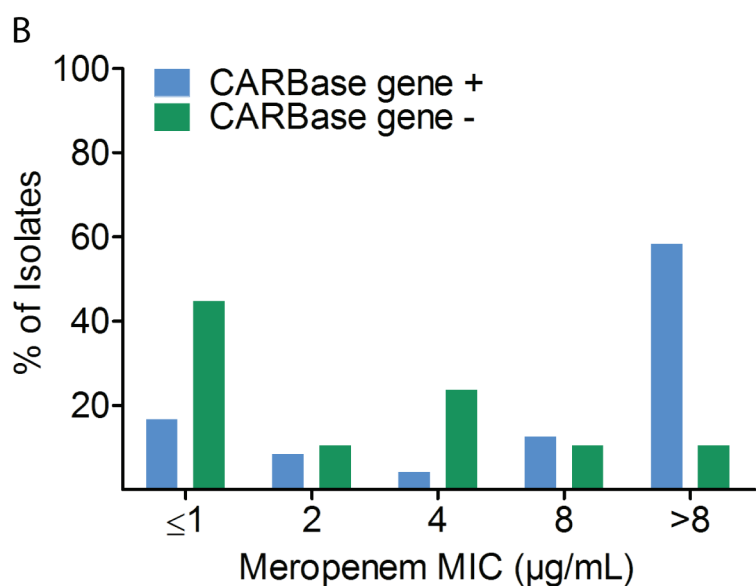

**Figure 2. Distribution of imipenem and meropenem MICs in CRE isolates with and without a carbapenemase gene.** Bars show percentage of imipenem (A) and meropenem (B) MICs for carbapenemase gene-negative (CARBase gene -; green bars) and carbapenemase gene-positive (CARBase gene +; blue bars) CRE isolates.

A

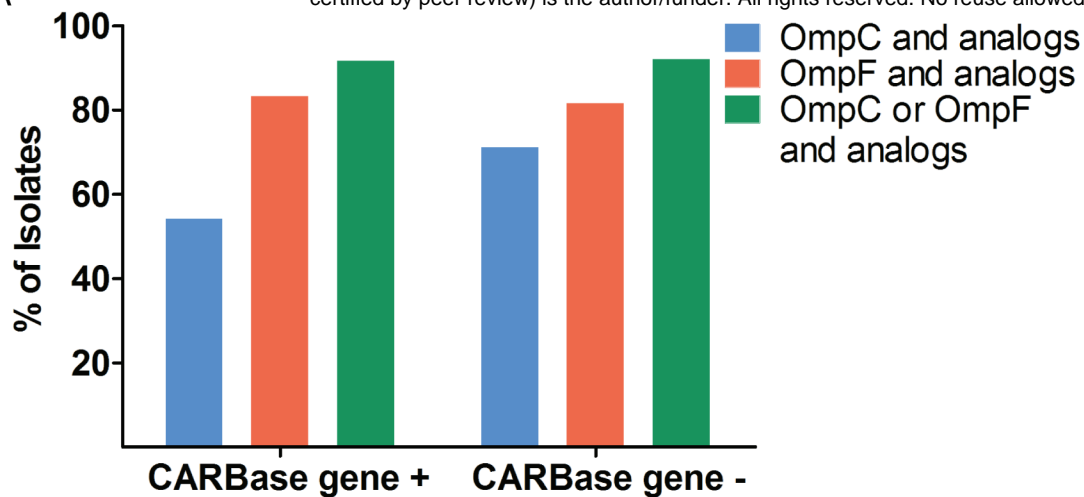

B

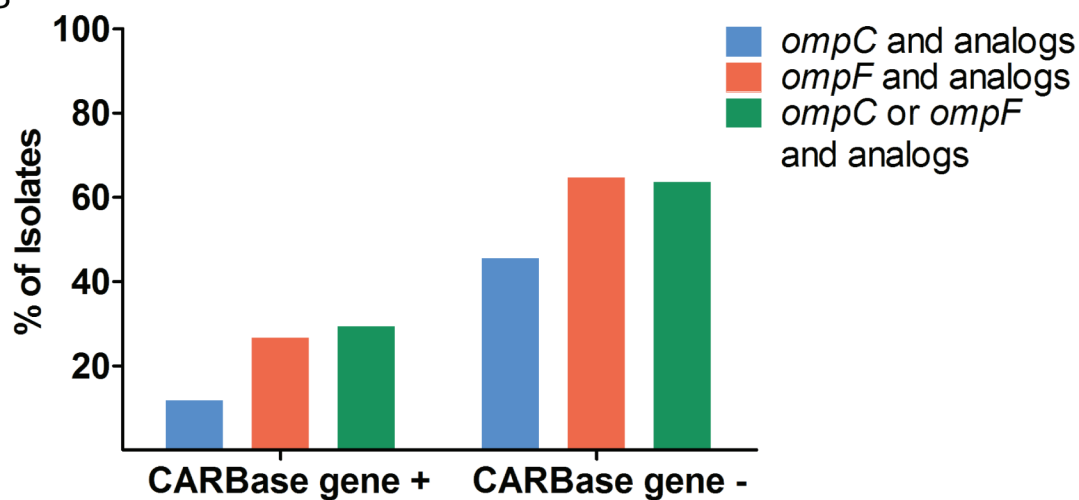

**Figure 3. Porin protein and mRNA levels in CRE isolates with and without a carbapenemase gene.** Bars show percentage of carbapenemase gene-positive (CARBase gene +) and gene-negative (CARBase gene -) CRE isolates with relative protein (A) and porin mRNA (B) down 2-fold or more compared with susceptible isolates.

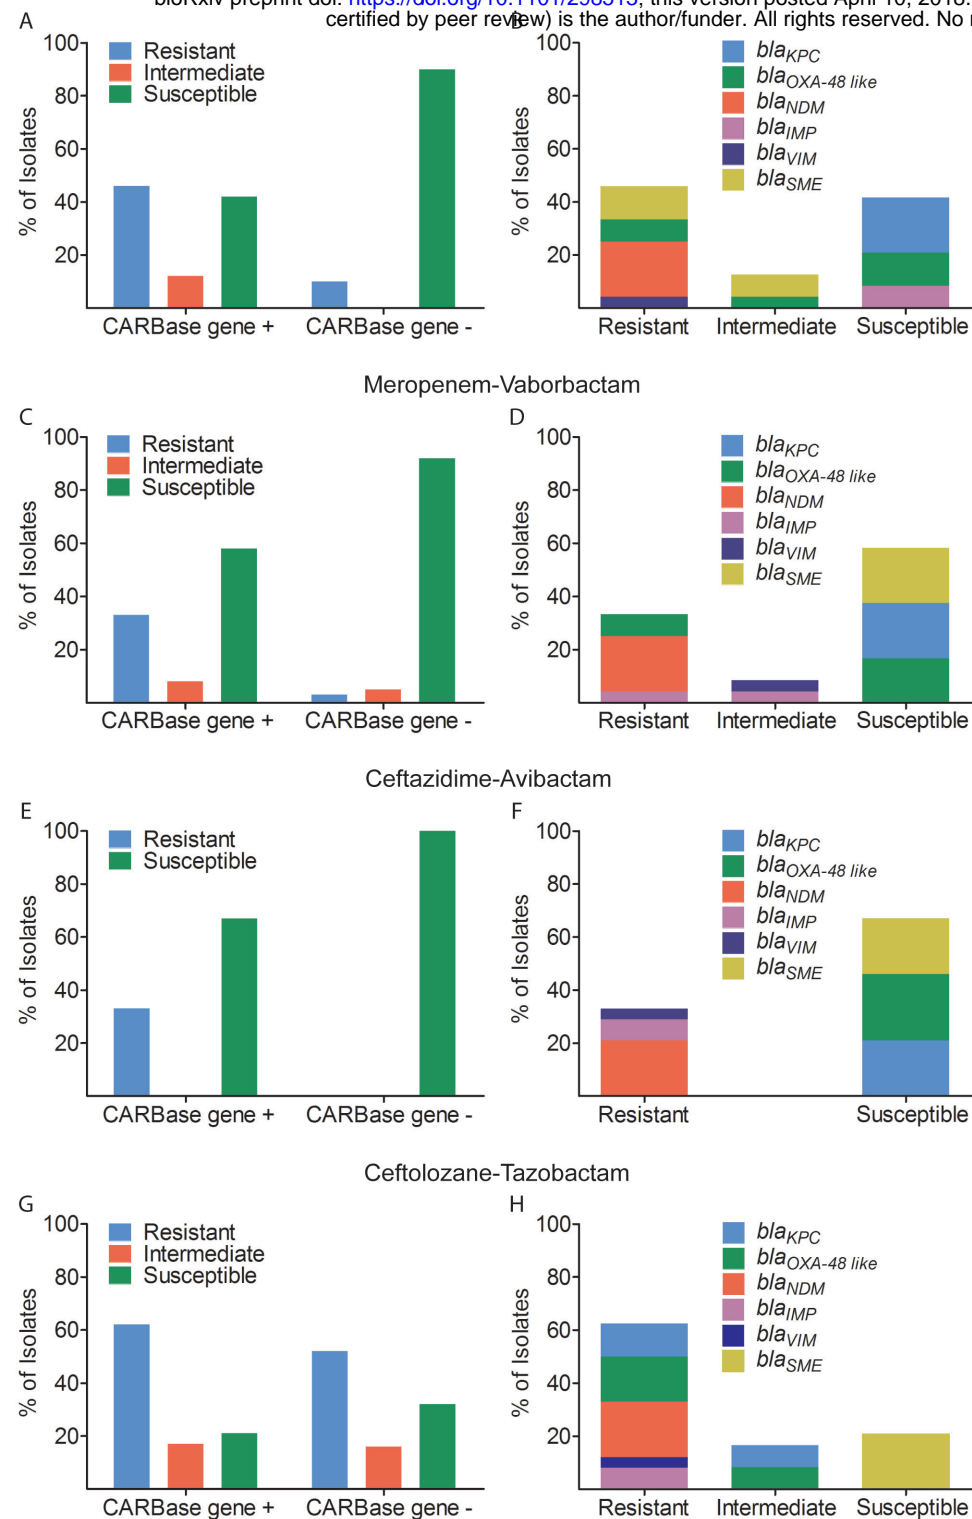

**Figure 4. Susceptibility of CRE isolates to imipenem-relebactam, meropenem-vaborbactam, ceftazidime-avibactam, and ceftolozane-tazobactam.** Bars show percent susceptibility of carbapenemase gene-positive (CARBase gene +) and gene-negative (CARBase gene -) CRE to (A) imipenem-relebactam, (C) meropenem-vaborbactam, (E) ceftazidime-avibactam, and (G) ceftolozane-tazobactam. Graphs on the right (B, D, F, H) show fraction of carbapenemase genes detected in carbapenemase gene-positive isolates that are susceptible, intermediate, or resistant to the respective antibiotic combination.

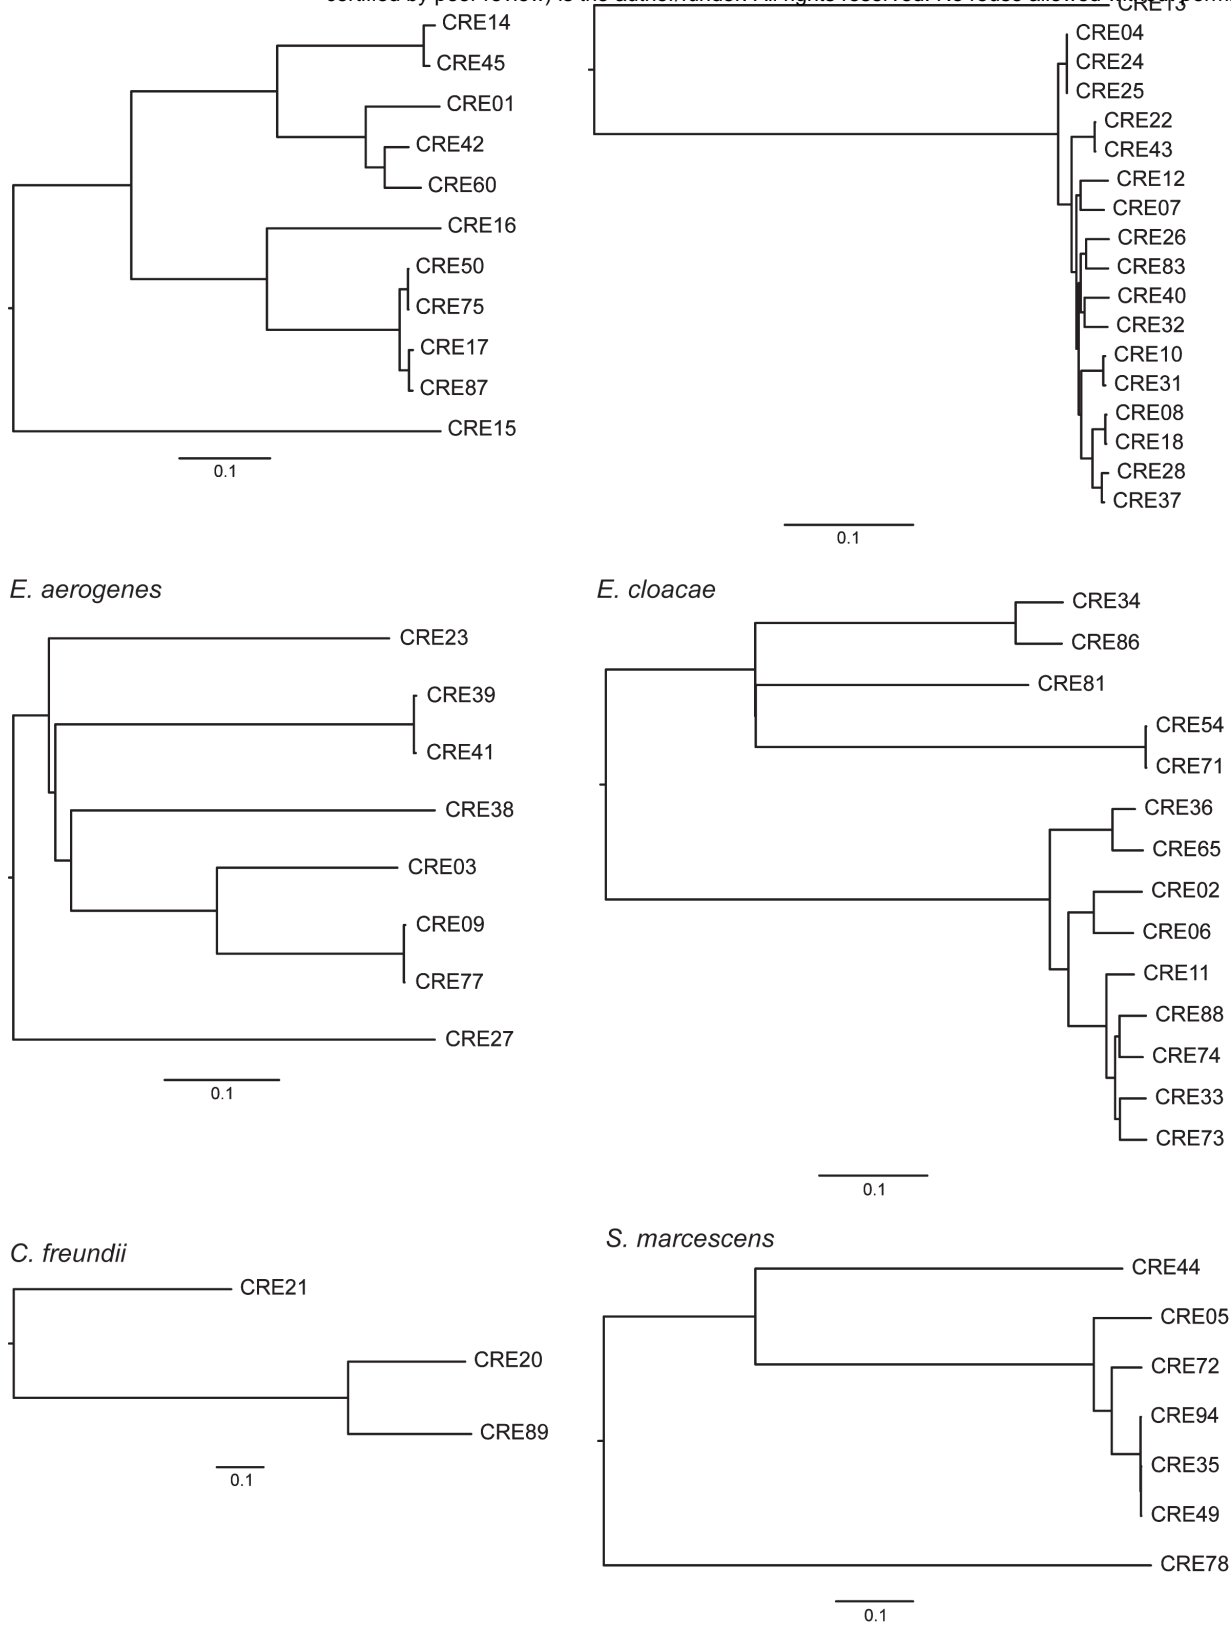

**Figure 5. Phylogenetic tree for CRE isolates based on whole genome sequencing.**

Phylogenetic trees were computed from multiple sequence alignments of concatenated SNVs on a per-species basis. Scale bars show evolutionary distances.
